# Supplementary material for: Biodegradation of Oil by a Newly Isolated Strain Acinetobacter junii WCO-9 and Its Comparative Pan-Genome Analysis
Source: MDPI journal article supplement (doi:10.3390/microorganisms11020407), 2023-02-06
Supplement: s1 [file s1]

# Biodegradation of Oil by a Newly Isolated Strain *Acinetobacter junii* WCO-9 and Its Comparative Pan-Genome Analysis

Shijie Jiang <sup>1,2,\*†</sup>, Qingfeng Fan <sup>1,2†</sup>, Zeying Zhang <sup>1</sup>, Yunfeng Deng <sup>1,2</sup>, Lihong Wang <sup>1</sup>, Qilin Dai <sup>1,2</sup>, Jin Wang <sup>3</sup>, Min Lin <sup>3</sup>, Jian Zhou <sup>1,2</sup>, Zhijian Long <sup>1,2</sup>, Guiqiang He <sup>1,2</sup> and Zhengfu Zhou <sup>3,\*</sup>

<sup>1</sup> School of Life Science and Engineering, Southwest University of Science and Technology, Mianyang 621010, China

<sup>2</sup> Engineering Research Center of Biomass Materials, Ministry of Education, Southwest University of Science and Technology, Mianyang 621010, China

<sup>3</sup> Key Laboratory of Agricultural Microbiome (MARA), Biotechnology Research Institute, Chinese Academy of Agricultural Sciences, Beijing 100081, China

\* Correspondence: shijiejiang525@163.com (S.J.); zhouzhengfu@caas.cn (Z.Z.)

† These authors contributed equally to this work.

## Supplementary Materials

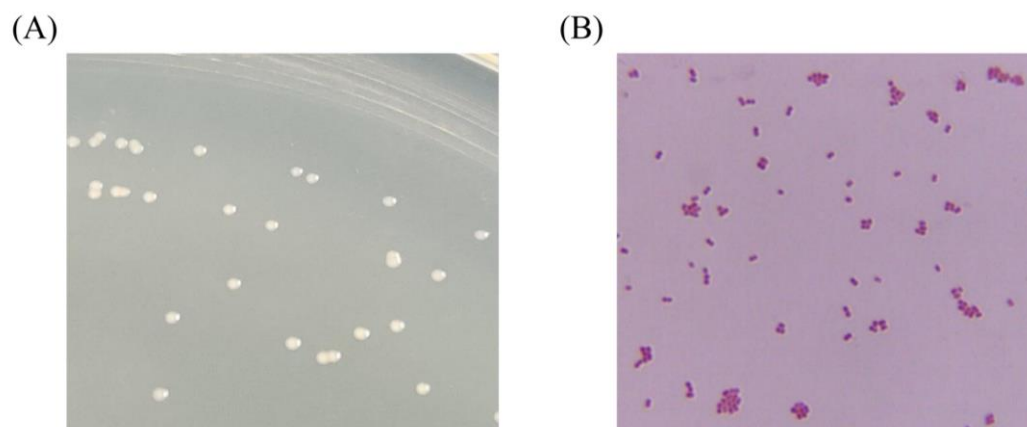

**Figure S1.** Colony morphology and Gram staining of strain WCO-9

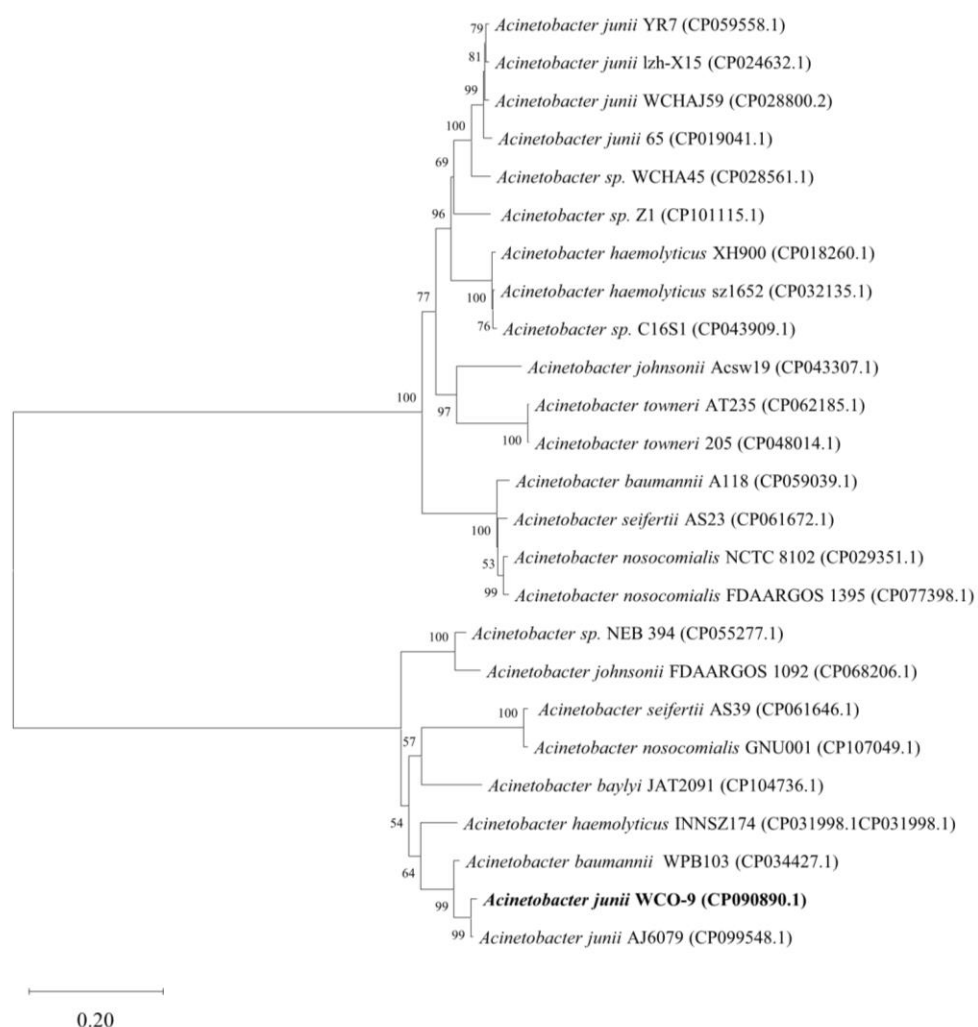

**Figure S2.** Phylogenetic tree based on the *ileS* gene sequence. This tree was constructed by the neighbor-joining method, and showed the phylogenetic relationship between strain WCO-9 and closely related species.

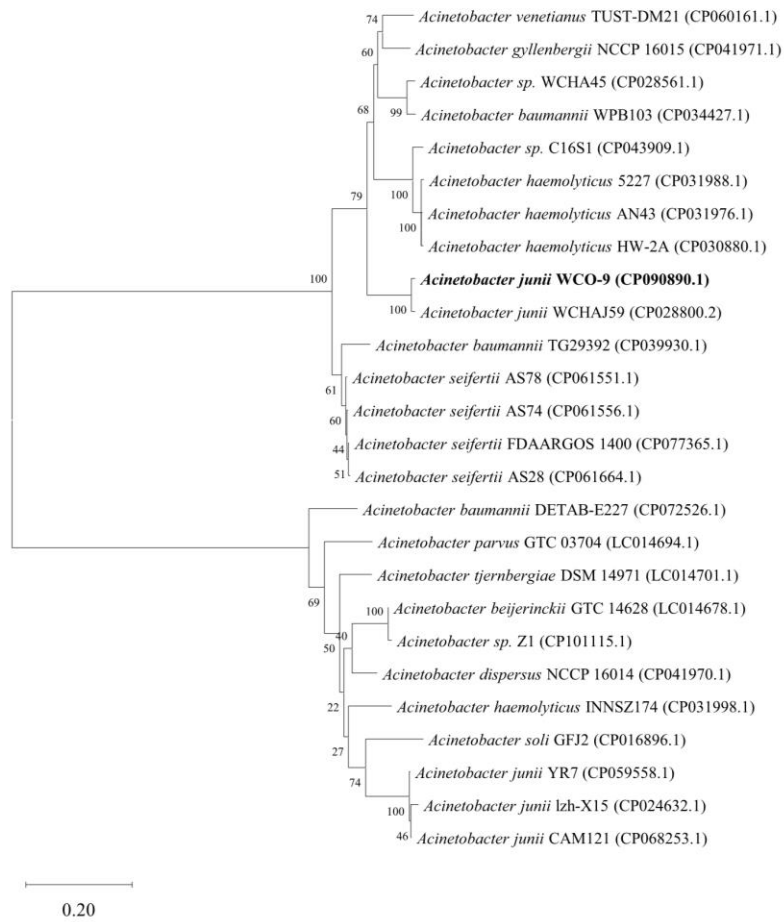

**Figure S3.** Phylogenetic tree based on the *recA* gene sequence. This tree was constructed by the neighbor-joining method, and showed the phylogenetic relationship between strain WCO-9 and closely related species.

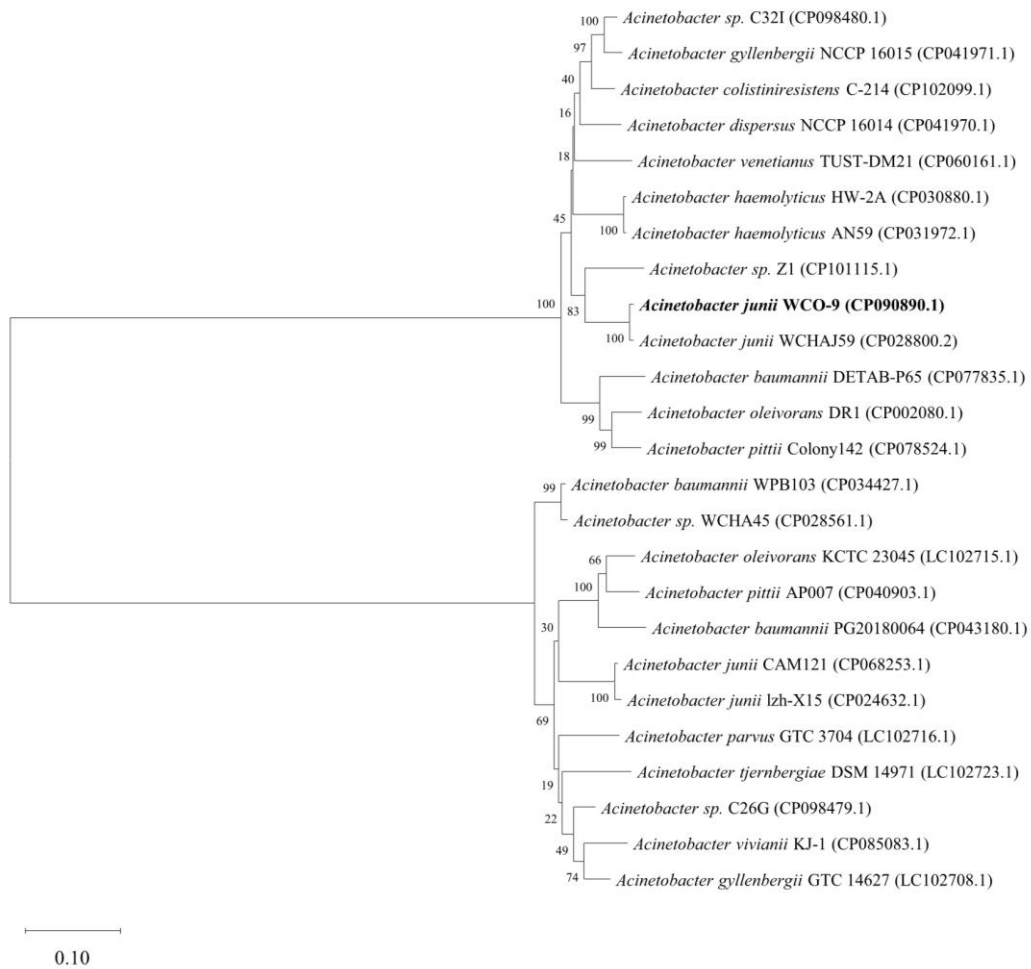

**Figure S4.** Phylogenetic tree based on the *rpoD* gene sequence. This tree was constructed by the neighbor-joining method, and showed the phylogenetic relationship between strain WCO-9 and closely related species.

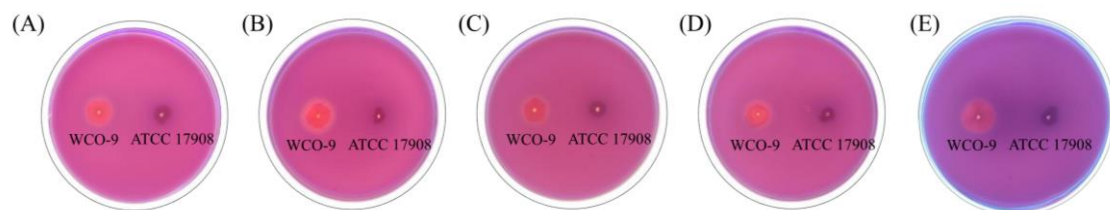

**Figure S5.** Degradation of five oils by strain WCO-9 and ATCC 17908. (A) Corn oil; (B) Peanut oil; (C) Canola oil; (D) Soybean oil; (E) Olive oil.

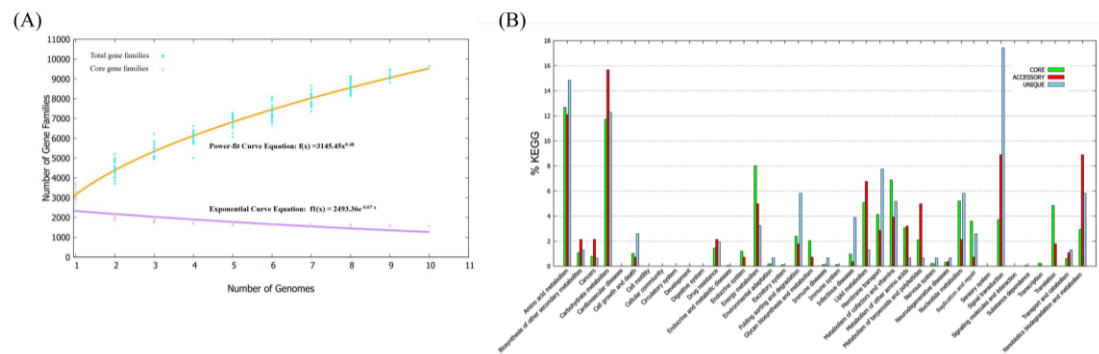

**Figure S6.** Pan-genome analysis of *A. junii* strains. (A) Mathematical modeling of the pan-genome and core genome of *A. junii*. (B) Bar chart showing functional proportions (based on KEGG categories) of different parts of the *A. junii* pan-genome (i.e., core, accessory, unique).
